**S4 Fig. Length of top 10 most abundant shed barcodes for each mouse.** The length of the barcodes for the top 10 most abundant shed barcodes (“top 10” determined by the greatest amount of a barcode shed at any single time point). Most barcodes retain an insert length of 12 nucleotides, as expected from the library design.

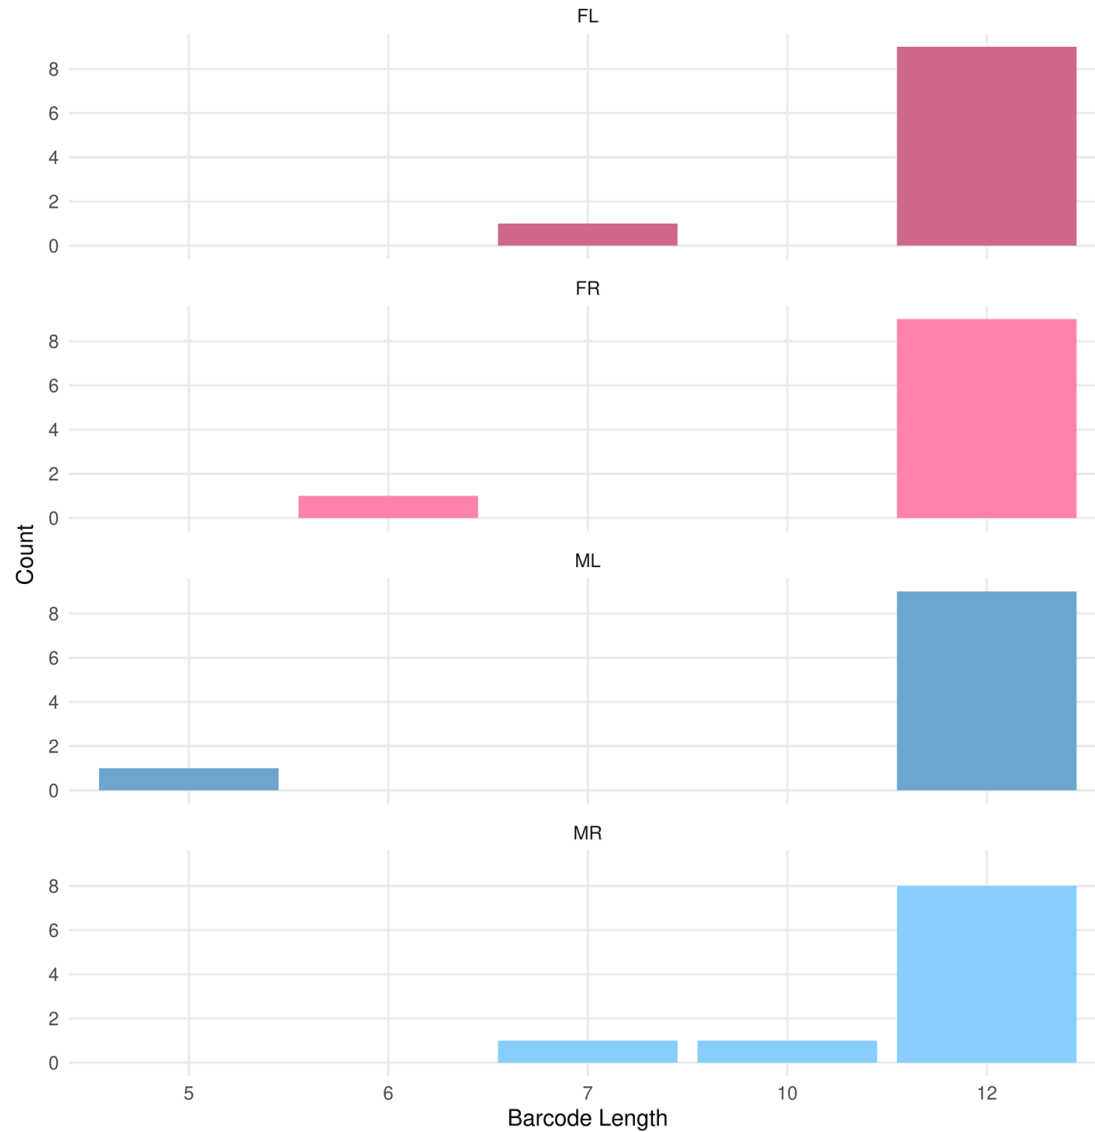

Source: https://storage.googleapis.com/plos-corpus-prod/10.1371/journal.ppat.1013083/2/ppat.1013083.s004.pdf
