**S5 Fig. Total amounts of muPyV DNA in organs.**

Plotted are muPyV genomes equivalent determined by qPCR and normalized per  $\mu\text{g}$  of total DNA purified from organs or per  $\mu\text{l}$  of whole blood.

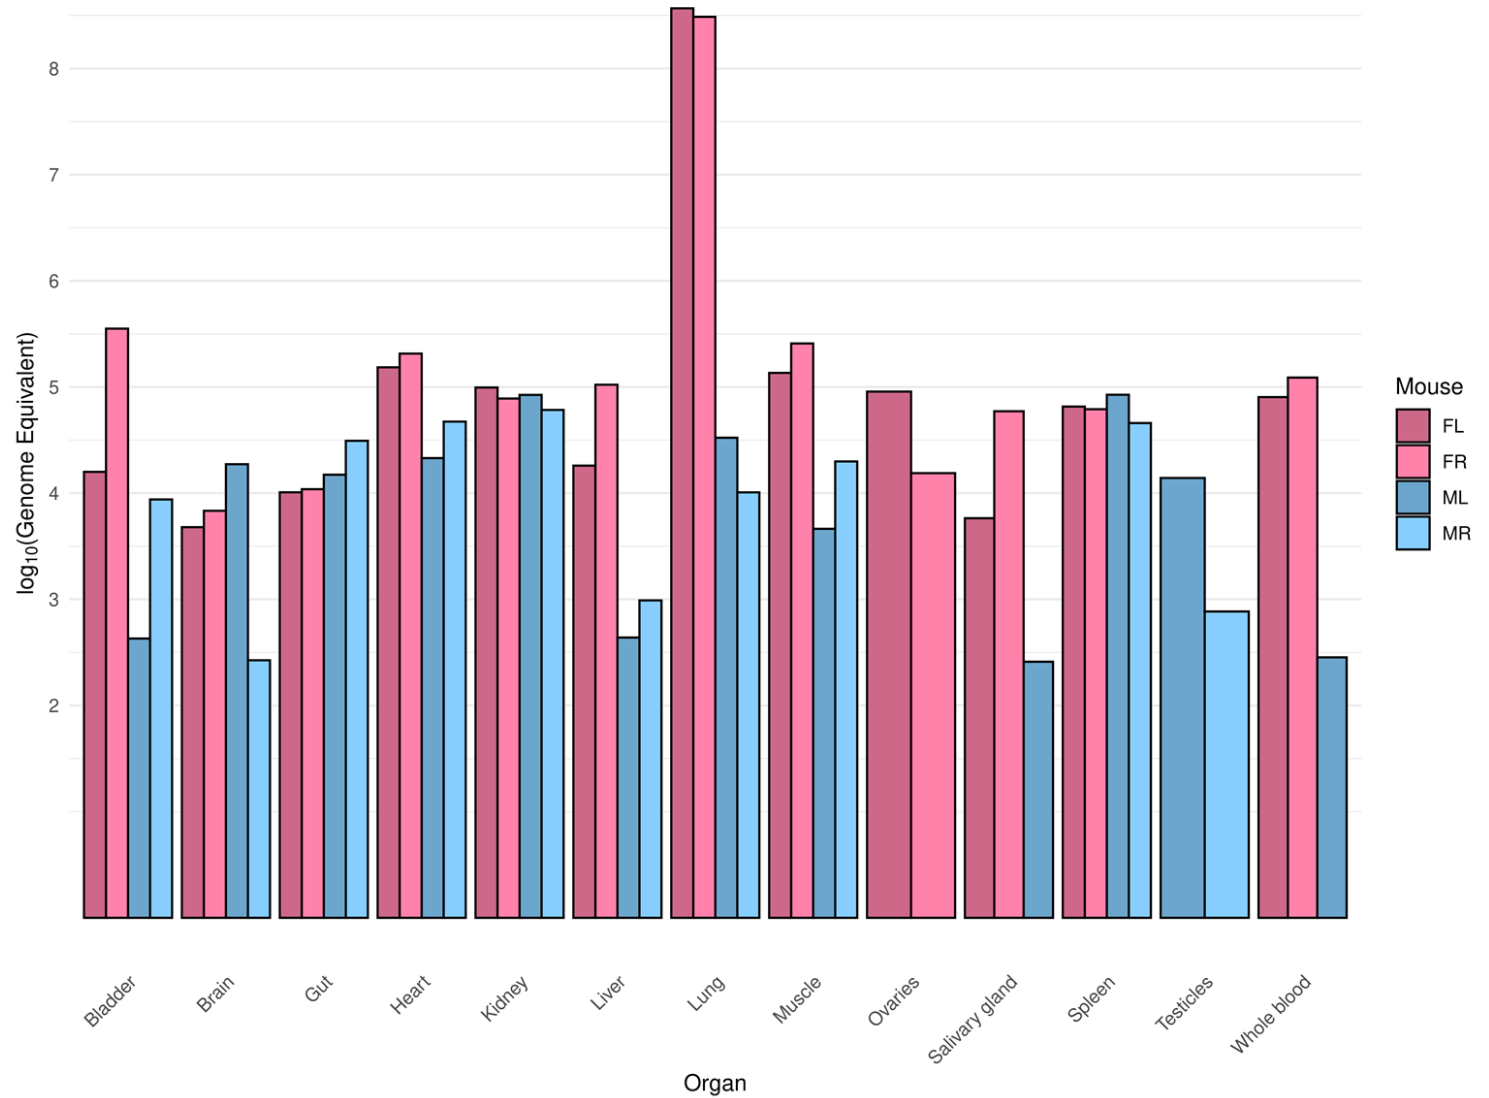

Source: https://storage.googleapis.com/plos-corpus-prod/10.1371/journal.ppat.1013083/2/ppat.1013083.s005.pdf
