**S6 Fig.** Statistical significance of barcode overlap between the top 5% of barcodes in urine and tissue samples across animals. The y-axis represents the  $-\log_{10}$  transformed p-values from Fisher's exact test, indicating the strength of association between barcode presence in urine and tissue. Asterisks denote significance levels: \* $p < 0.05$ , \*\* $p < 0.01$ , \*\*\* $p < 0.001$ , \*\*\*\* $p < 0.0001$ , and \*\*\*\*\* $p < 0.00001$ .

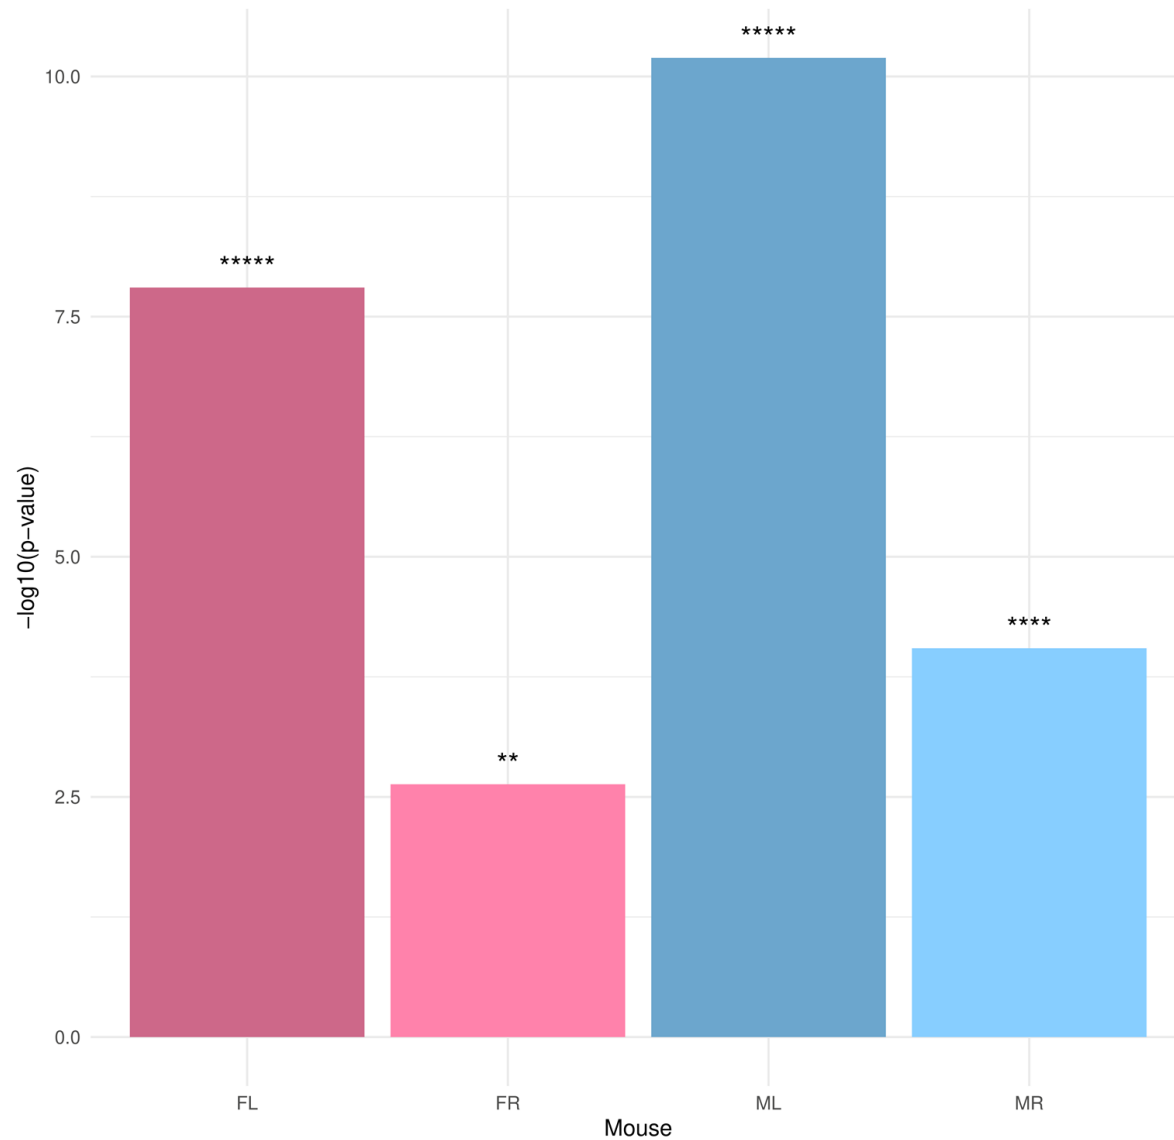

Source: https://storage.googleapis.com/plos-corpus-prod/10.1371/journal.ppat.1013083/2/ppat.1013083.s006.pdf
