**S1 Table: Virus stocks titer (IU/mL) as determined by immunofluorescence assay.**

|                 | <b>PTA muPyV</b>   | <b>Dunlop BKPyV</b> |
|-----------------|--------------------|---------------------|
| Virus wild-type | $7.14 \times 10^6$ | $2.22 \times 10^6$  |
| Virus library 1 | $2.50 \times 10^6$ | $3.08 \times 10^6$  |
| Virus library 2 | N/A                | $3.24 \times 10^6$  |
