**S3 Table - Median rank of top 10 most abundant in urine or tissue for each mouse.**

| <b>Animal</b> | <b>Urine</b> | <b>Tissue</b> |
|---------------|--------------|---------------|
| FL            | 1180.5       | 884           |
| FR            | 456          | 848           |
| ML            | 651.5        | 292.5         |
| MR            | 1266.5       | 1312.5        |
