**S4 Table: Mutations in muPyV genomes found in female mice's lung and tumor.**

| Mouse | Tissue | Clone  | Barcode      | Mutation                                |                                     |                                          |                                             |                                      |
|-------|--------|--------|--------------|-----------------------------------------|-------------------------------------|------------------------------------------|---------------------------------------------|--------------------------------------|
|       |        |        |              | NCCR-VP coding region*                  | VP1 coding region**                 | NCCR*                                    | Middle and small T antigens coding region** | Large T-antigen coding region**      |
| FL    | Tumor  | LTFL5  | CCACCCTATAAA | In frame deletion<br>2415-3466 (1052bp) | Point mutation:<br>Leu38<br>CTG>TTG | -                                        | -                                           | -                                    |
|       | Lung   | LUFL1  | AAGTACGGGCGC | In frame deletion<br>2920-3544 (625bp)  | -                                   | Point mutations:<br>3686 G>T<br>3788 C>A | Frameshift deletion:<br>Trp88<br>CCA>-CA    | Substitution:<br>Ala50Val<br>GCC>GTC |
|       |        | LUFL5  | CGGAAGGTCATG | In frame deletion<br>2920-3544 (625bp)  | -                                   | Point mutation:<br>3686 G>T              | -                                           | -                                    |
| FR    | Lung   | LUFR17 | CAGCCCATCTAA | In frame deletion<br>2037-3540 (1504bp) | -                                   | -                                        | -                                           | -                                    |

\*Nucleotide and \*\*amino acid positions is referred to the muPyV strain PTA genome (GenBank No U27812).  
“-“ stands for no mutation found.
